# Supplementary material for: Colossal thermoelectric enhancement in Cu2+xZn1−xSnS4 solid solution by local disordering of crystal lattice and multi-scale defect engineering
Source: Royal Society of Chemistry journal article supplement (doi:10.1039/d0ta01595d), 2020-01-01
Supplement: d0ta01595d1.pdf [file d0ta01595d1.pdf]

## Supporting Information

### **Colossal Thermoelectric Enhancement in $\text{Cu}_{2+x}\text{Zn}_{1-x}\text{SnS}_4$ solid solution by local disordering of crystal lattice and multi-scale defect engineering**

*Qinghui Jiang\*, Haixue Yan, Yuanhua Lin, Yang Shen, Junyou Yang\*, and Michael J. Reece\**

Q. H. Jiang, and J.Y. Yang

State Key Laboratory of Materials Processing and Die & Mould Technology, and School of Materials Science and Engineering, Huazhong University of Science and Technology, Wuhan 430074, P. R. China

e-mail: qhjiang@hust.edu.cn and jyyang@hust.edu.cn

H. X. Yan, and M. J. Reece

School of Engineering and Materials Science, Queen Mary University of London, Mile end road, London, E1 4NS, UK

e-mail: m.j.reece@qmul.ac.uk

Y. H. Lin, and Y. Shen

State Key Laboratory of New Ceramics and Fine Progressing, Tsinghua University, Beijing 100084, PR China

Keywords: Thermoelectrics, dynamic plastic deformation, spark plasma sintering, sulfide

Table S1. The price of elements and their content in the earth's crust (from www.1688.com).

| elements | \$/ton | Element Content in the earth<br>(ppm) |
|----------|--------|---------------------------------------|
| Cu       | 6000   | 100                                   |
| S        | 200    | 500                                   |
| Zn       | 1500   | 200                                   |
| Sn       | 16000  | 3                                     |
| Pb       | 2000   | 15                                    |
| Sb       | 10000  | 0.5                                   |
| Ti       | 20000  | 6300                                  |
| Te       | 100000 | 1                                     |
| Bi       | 20000  | 20                                    |
| Se       | 100000 | 0.05                                  |
| Ag       | 300000 | 0.07                                  |
| Mg       | 4000   | 20000                                 |
| Ni       | 50000  | 180                                   |

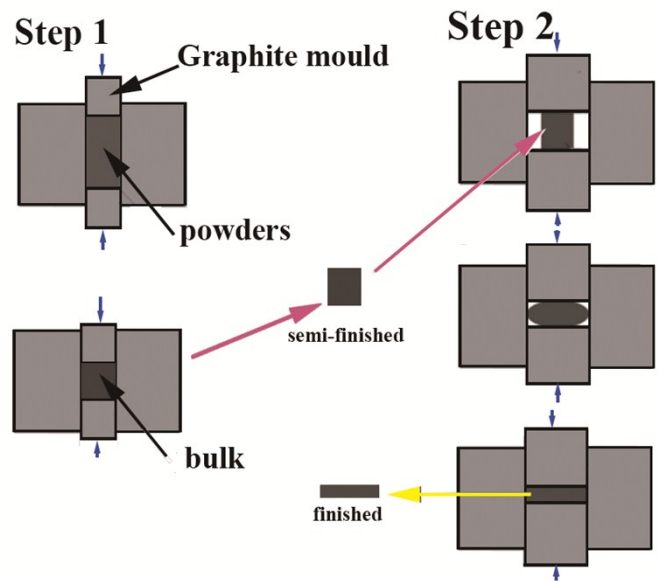

Figure S1. Schematic diagram of hot forging process.

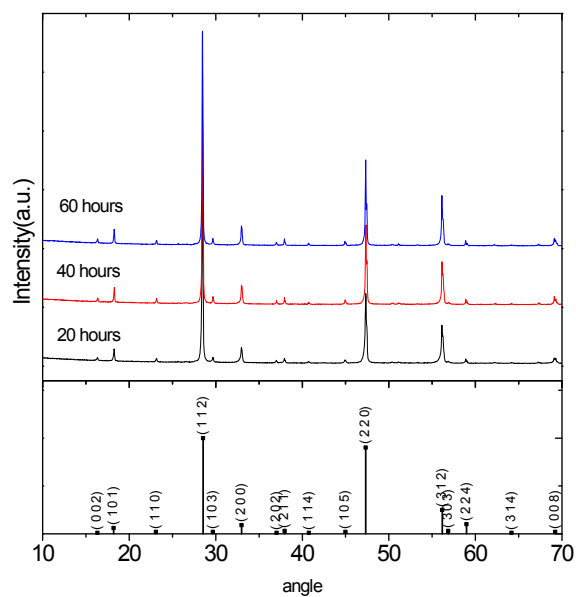

Figure S2. XRD patterns of  $\text{Cu}_2\text{ZnSnS}_4$  powders ball milled at 350 rpm for different times.

(The data were collected using Siemens D5000 (Karlsruhe, Germany) in Queen Mary University of London.)

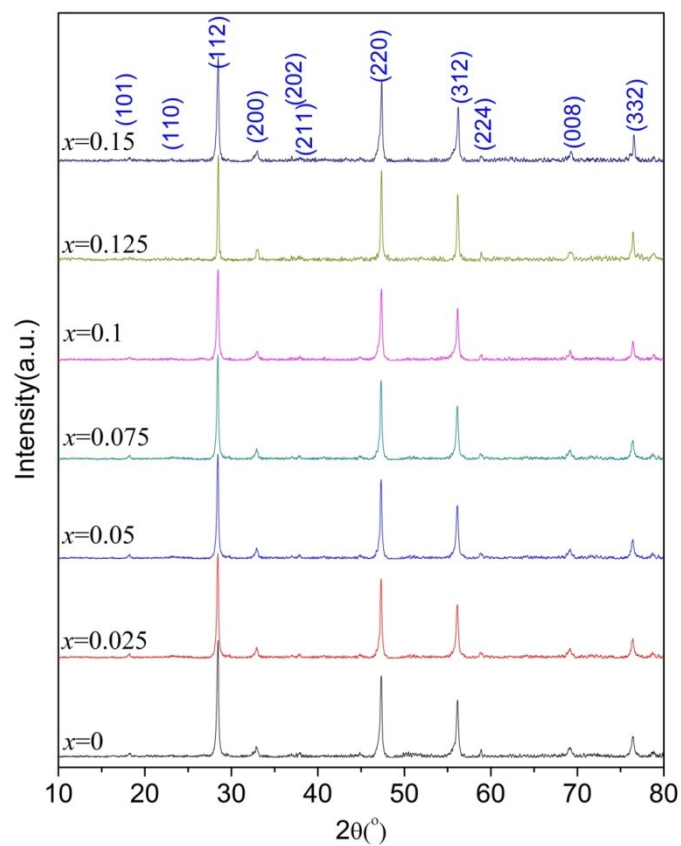

Figure S3. XRD patterns of  $\text{Cu}_{2+x}\text{Zn}_{1-x}\text{SnS}_4$  powders ball milled at 350 rpm for 40 hours (The data were collected using Rigaku D/max-rB (Akishima, Tokyo, Japan) in Tsinghua University.)

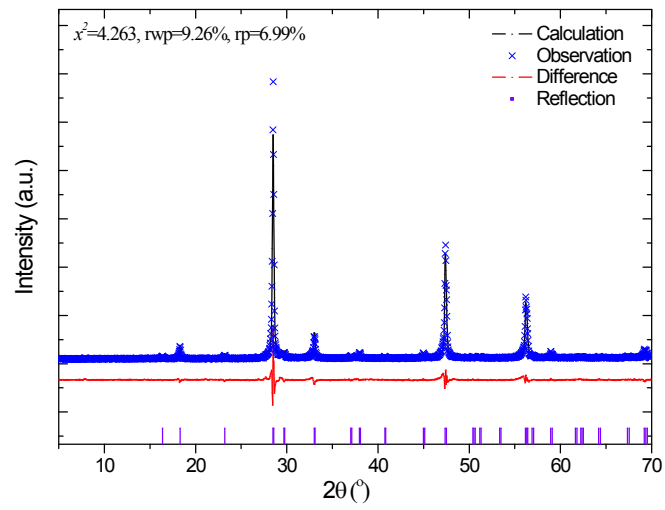

Figure S4 XRD data including profile fit, profile difference, and profile residuals of the corresponding Rietveld fit of  $\text{Cu}_{2.125}\text{Zn}_{0.875}\text{SnS}_4$  bulk after hot forging

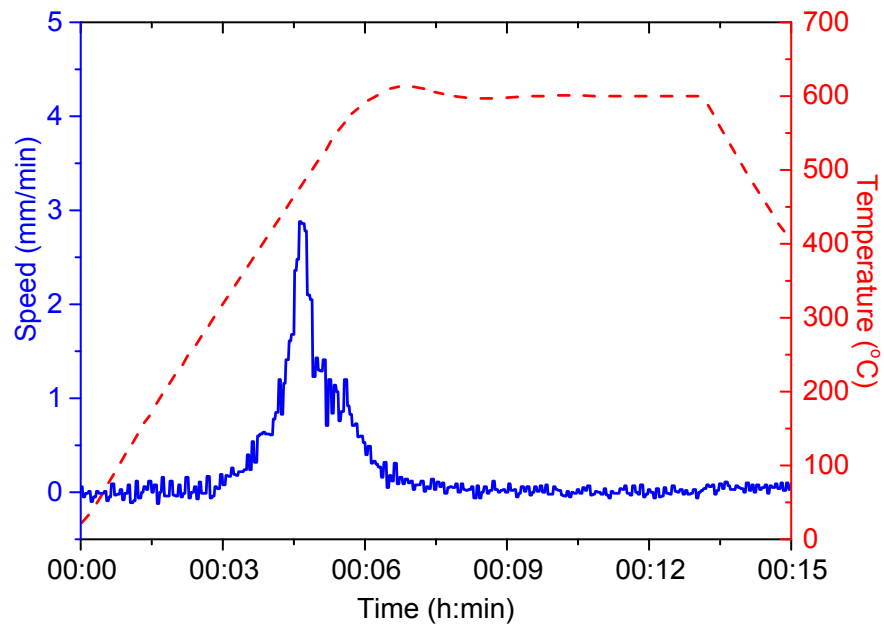

Figure S5. The SPS outputs for  $\text{Cu}_{2.125}\text{Zn}_{0.875}\text{SnS}_4$  sintered at 600 °C for 8 mins under 60 MPa (first step).

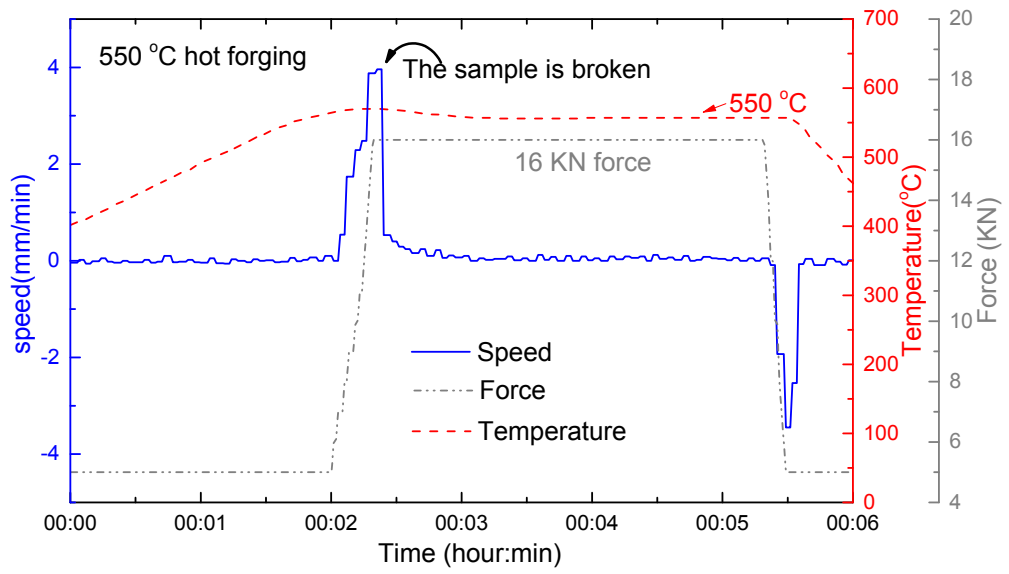

Figure S6. The SPS outputs of  $\text{Cu}_{2.125}\text{Zn}_{0.875}\text{SnS}_4$  prepared by hot forging at  $550\text{ }^\circ\text{C}$  under  $50\text{ MPa}$  (second step). The sample broke at  $0.5\text{ min}$ .
